# Supplementary material for: Quercetin inhibition of porcine intestinal alpha coronavirus in vitro and in vivo
Source: PubMed Central journal article supplement (PMC10988794; doi:10.1186/s12917-024-03984-2), 2024-04-03
Supplement: 12917_2024_3984_MOESM1_ESM.pdf [file 12917_2024_3984_MOESM1_ESM.pdf]

The uncropped Western blot shown in Fig.4B

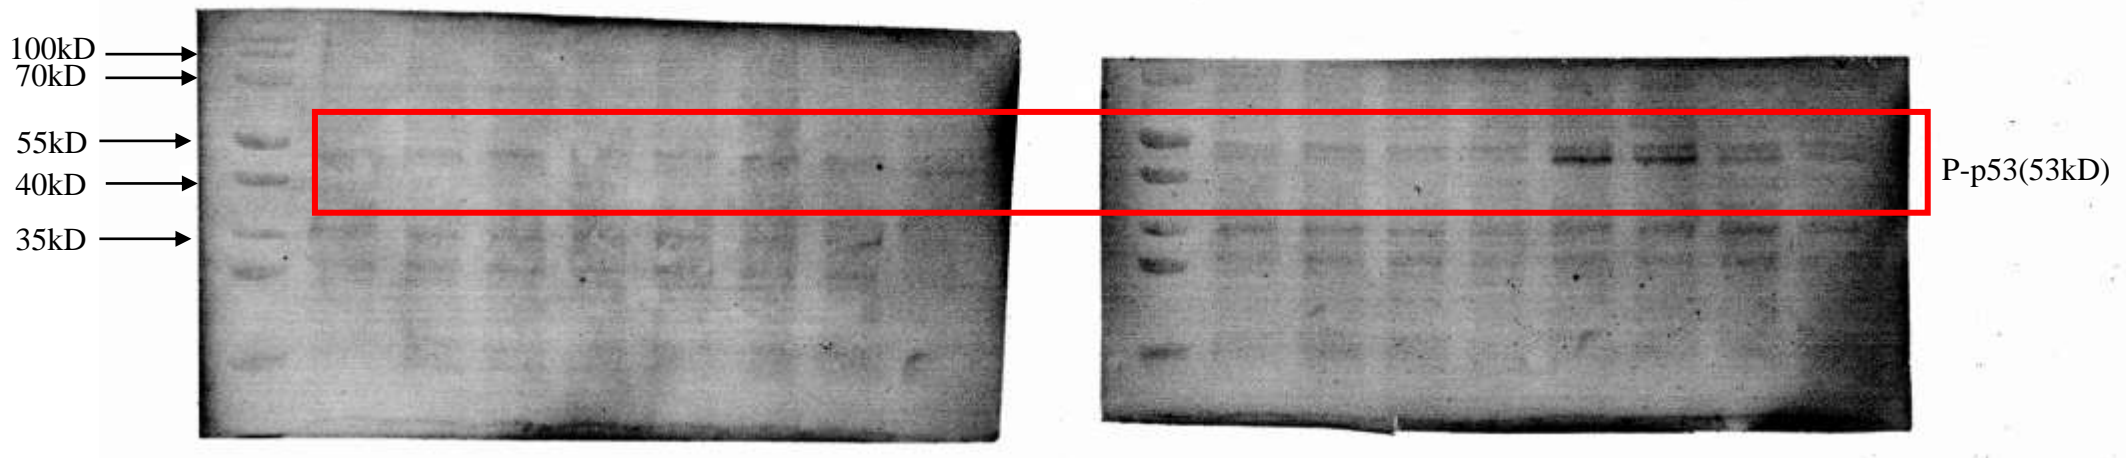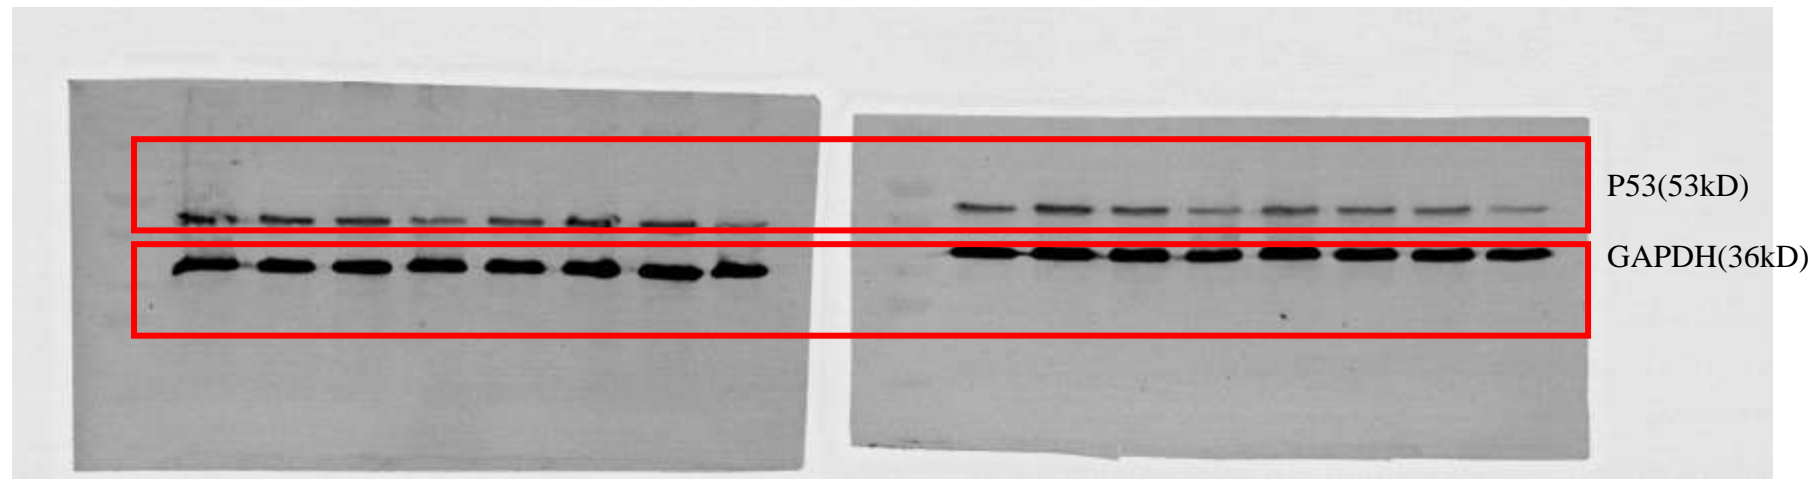

Figure S2 represents the uncropped western blot scan shown in Figure 4.
